# Supplementary material for: Vulnerability and Adaptation to Extreme Heat in Odisha, India: A Community Based Comparative Study
Source: PubMed Central journal article supplement (PMC6950623; doi:10.3390/ijerph16245065), 2019-12-12
Supplement: ijerph-16-05065-s001.pdf [file ijerph-16-05065-s001.pdf]

## Supplementary file

### Definition of 'heat illness'

*Heat-related symptoms and illnesses:* small blisters or pimples, dry mouth, fatigue, leg cramps, heavy sweating, intense thirst, rapid heartbeat, headache, and leg swelling.

*Heat cramp:* any painful involuntary brief muscle cramps, spasm or jerk due to heat

*Heat exhaustion:* fatigue and collapse resulting from prolonged exposure to excessive or unaccustomed heat

*Heat Syncope:* fainting or fell-down or go senseless because of excessive heat

*Heat Rash:* an irritation of the skin that results from excessive sweating during hot and humid weather. It can be small blisters or pimples

*Heat Stroke:* fever and often by unconsciousness when exposed to excessively high temperatures.

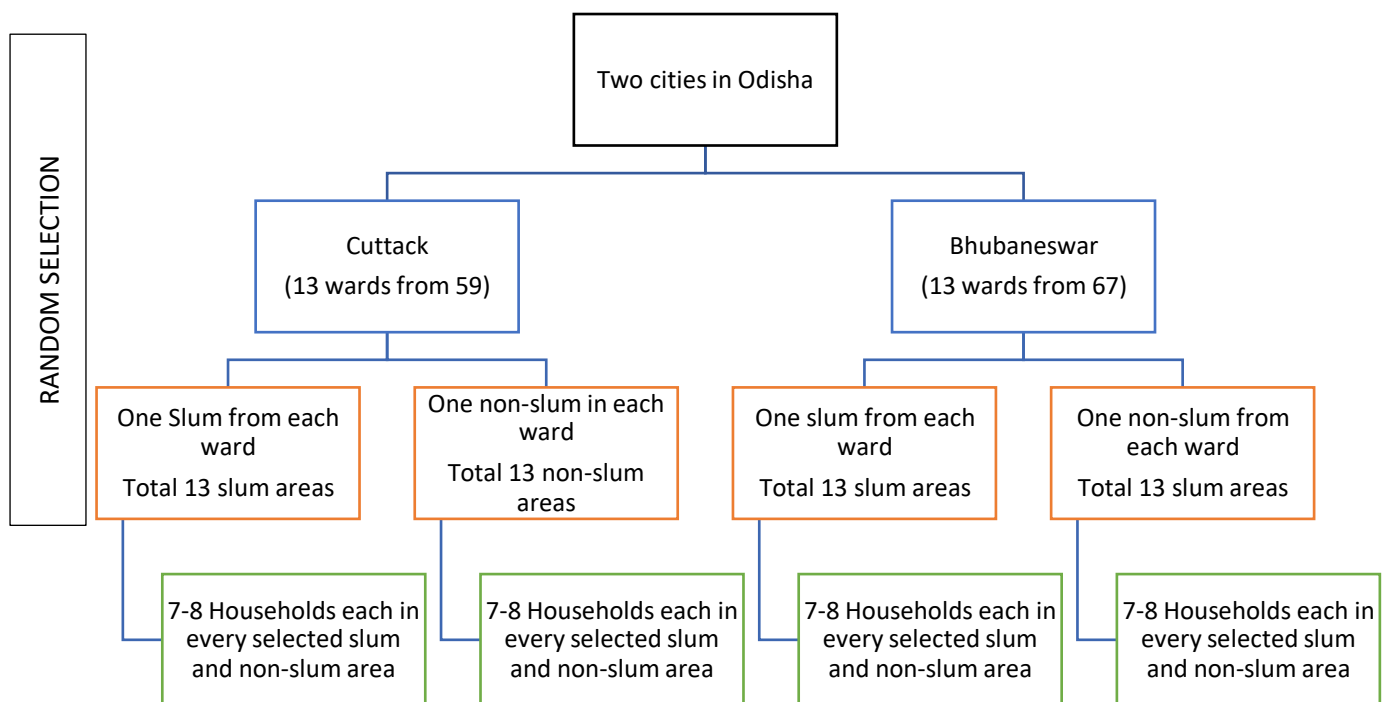

Firstly, we listed the wards of twin city (total =126; Bhubaneswar=67 and Cuttack=59) and randomly selected 13 wards from each city (total 26 wards) covering 20% of total wards. Secondly, from each selected ward, one slum area and adjacent non-slum area was again randomly selected. We chose an adjustment non-slum area for better comparison and adjusting for geographical variation. Thirdly, within each selected area 29 HHs were chosen through systematic random sampling method. First house was selected randomly then every 4<sup>th</sup> house on right side of the interviewed HHs was included until we covered the locality. According to available data, average number of HHs in one locality varies from 80-100. To over 382 HHs in each city we required nearly 15 HHs per area (=382/26). In each households, all eligible individuals were included for the study.

Supplementary Table S1. List of chronic conditions reported across the group.

|                         |                     | Slum (n=404)        | Non-slum (n=695)    | Total (n=1099)      | P value <sup>#</sup> |
|-------------------------|---------------------|---------------------|---------------------|---------------------|----------------------|
|                         |                     | Percentage [95% CI] | Percentage [95% CI] | Percentage [95% CI] |                      |
| Diseases                | Hypertension        | 17.8[14.4-21.9]     | 15.0[12.5-17.8]     | 16.0[14.0-18.3]     | 0.213                |
|                         | Arthritis           | 9.1[6.7-12.4]       | 4.1[2.8-5.8]        | 5.9[4.7-7.5]        | 0.001                |
|                         | Acid peptic disease | 5.4[3.6-8.1]        | 7.2[5.5-9.4]        | 6.6[5.2-8.2]        | 0.259                |
|                         | Diabetes            | 11.1[8.4-14.6]      | 11.5[9.4-14.1]      | 11.4[9.6-13.4]      | 0.851                |
|                         | Anemia              | 2.1[0.99-3.9]       | 0.7[0.3-1.7]        | 1.2[0.7-2.02]       | 0.062                |
|                         | Infection           | 4.2[2.6-6.7]        | 1.6[0.9-2.8]        | 2.5[1.7-3.7]        | 0.008                |
|                         | Asthma/COPD         | 11.9[9.1-15.4]      | 1.4[0.8-2.6]        | 5.3[4.1-6.7]        | <0.001               |
|                         | Weight problem      | 0                   | 0.4 [0.1-1.33]      | 0.3[0.01-0.8]       |                      |
|                         | Skin Disease        | 12.1[9.3-15.7]      | 3.2[2.1-4.8]        | 6.5[5.1-8.1]        | <0.001               |
|                         | Heart Disease       | 0.5 [0.1-1.9]       | 0.6[0.2-1.5]        | 0.5 [0.2-1.2]       | 0.861                |
|                         | Kidney problem      | 0                   | 1[0.5-2.1]          | 0.6[0.3-1.3]        | 0.043                |
|                         | Mental Illness      | 0.2[0.03-1.7]       | 1.1[0.6-2.3]        | 0.8[0.4-1.6]        | 0.109                |
|                         | Stroke              | 2.5[1.3-4.5]        | 2.3[1.4-3.7]        | 2.4[1.6-3.5]        | 0.856                |
| Count                   | Zero                | 44.1[39.2-48.9]     | 72.2[68.8-75.4]     | 61.9[58.9-64.7]     | <0.001               |
|                         | One                 | 43.6[38.8-48.4]     | 12.7[10.4-15.3]     | 24.0[21.6-26.6]     |                      |
|                         | Two                 | 4.7[3.0-7.3]        | 8.3[6.5-10.6]       | 7.0[5.6-8.7]        |                      |
|                         | Three               | 6.7[4.6-9.6]        | 6.3[4.7-8.4]        | 6.5[5.1-8.1]        |                      |
|                         | Four or more        | 1.0[0.3-2.6]        | 0.4[0.1-1.3]        | 0.6[0.3-1.3]        |                      |
| Currently on medication | Yes                 | 36.4 [31.8-41.2]    | 16.4 [13.8-19.3]    | 23.7 [21.3-26.3]    | <0.001               |

#Chi square test, P value was significant at the level <0.05

Supplementary Table S2. List of heat illness across the group.

|                   |                 | Slum (n=404)        | Non-slum (n=695)    | Total (n=1099)      | P value <sup>#</sup> |
|-------------------|-----------------|---------------------|---------------------|---------------------|----------------------|
|                   |                 | Percentage [95% CI] | Percentage [95% CI] | Percentage [95% CI] |                      |
| Ever experienced  | Heat cramp      | 11.6 [8.8-15.1]     | 31.7 [28.3-35.2]    | 24.3 [21.8-26.9]    | <0.001               |
|                   | Heat exhaustion | 48.8 [43.9-53.6]    | 46.3 [42.6-50.1]    | 47.2 [44.3-50.2]    | 0.436                |
|                   | Heat Syncope    | 8.2 [5.9-11.3]      | 1 [0.5-2.1]         | 3.6 [2.7-4.9]       | <0.001               |
|                   | Heat rash       | 4.5 [2.8-6.9]       | 2.9 [1.9-4.4]       | 3.5 [2.5-4.7]       | 0.167                |
|                   | Heat stroke     | 16.1 [12.8-20.1]    | 0.3 [0.07-1.15]     | 6.1 [4.8-7.7]       | <0.001               |
| Heat illness ever | Never           | 20.5 [16.9-24.8]    | 37 [33.4-40.6]      | 30.9 [28.3-33.7]    | <0.001               |
|                   | Once            | 70 [65.4-74.3]      | 43.9 [40.2-47.6]    | 53.5 [50.5-56.4]    |                      |
|                   | Twice           | 9.2 [6.7-12.4]      | 19.1 [16.4-22.2]    | 15.5 [13.4-17.7]    |                      |
|                   | Thrice          | 0.2 [0.03-1.74]     | 0                   | 0.1 [0.01-0.6]      |                      |

#Chi square test, P value was significant at the level <0.05

Supplementary Table S3. Climatic data of study cities during the past four months (summer) of the study period.

|                      | Bhubaneswar |       |     |      | Cuttack |       |     |      |
|----------------------|-------------|-------|-----|------|---------|-------|-----|------|
|                      | March       | April | May | June | March   | April | May | June |
| Maximum temp (°C)    | 38          | 41    | 42  | 43   | 39      | 41    | 42  | 43   |
| Minimum temp (°C)    | 21          | 20    | 24  | 24   | 21      | 22    | 20  | 24   |
| Average temp (°C)    | 28          | 30    | 32  | 32   | 28      | 30    | 30  | 30   |
| Average Humidity (%) | 73          | 75    | 70  | 80   | 73      | 74    | 70  | 80   |
